# Supplementary material
Source: PubMed Central journal article supplement (PMC4300707)
Supplement: ajcr0005-0333-f5.pdf [file ajcr0005-0333-f5.pdf]

## Esophageal GIST

**Supplemental Table 1.** Overview of patient's characteristics in detail

| Sex/age (L) | clinical symptoms |    |    |    | diagnostic |     |    |     |    | pathology |           |         |     | treatment & outcome |     |     |               |
|-------------|-------------------|----|----|----|------------|-----|----|-----|----|-----------|-----------|---------|-----|---------------------|-----|-----|---------------|
|             | Inc               | DP | WL | BL | EGD        | FNA | ES | EUS | CT | Loc       | Size      | MR      | CM  | Surg                | TKI | FU  | Outcome       |
| f/67 (1)    | +                 | -  | -  | -  | -          | -   | +  | -   | +  | L         | 3.0       | < 5/50  | ND  | EN                  | -   | ND  | ND            |
| m/53 (2)    | -                 | +  | +  | -  | -          | -   | -  | -   | +  | L         | 13.0      | 5-10/50 | ND  | -                   | +   | ND  | ND            |
| f/74 (3)    | -                 | +  | -  | -  | +          | +   | -  | -   | +  | M-L       | 12.0      | ND      | Sp  | TEE                 | -   | 24  | NoRec         |
| f/54 (4)    | +                 | -  | -  | -  | -          | -   | -  | -   | +  | L         | 11.0      | 2-3/10  | Sp  | TEE                 | +   | 79  | Rec           |
| m/74 (5)    | +                 | -  | -  | -  | +          | -   | -  | -   | +  | ND        | 0.2       | 4/50    | ND  | TEE                 | -   | ND  | ND            |
| m/62 (6)    | +                 | -  | -  | -  | +          | -   | -  | -   | +  | L         | 6.8       | 6/50    | ND  | TEE                 | -   | 12  | NoRec         |
| f/58 (7)    | -                 | -  | -  | -  | -          | -   | -  | -   | +  | L         | > 10.0    | 5/50    | ND  | TEE                 | ND  | ND  | ND            |
| m/21 (8)    | -                 | +  | -  | -  | +          | -   | -  | -   | +  | M-L       | 4.8       | 0/50    | Sp  | EN                  | -   | 18  | NoRec         |
| m/36 (8)    | -                 | +  | -  | -  | -          | -   | -  | +   | +  | L         | 6.5       | 0/50    | Sp  | EN                  | -   | 24  | NoRec         |
| m/69 (8)    | -                 | +  | +  | -  | +          | +   | -  | -   | +  | L         | 6.0       | > 50/50 | Sp  | TEE                 | +   | 12  | Rec           |
| f/66 (9)    | -                 | -  | -  | +  | -          | -   | -  | +   | +  | L         | 3.0       | < 1/10  | ND  | EN                  | -   | ND  | ND            |
| m/57 (10)   | -                 | ND | ND | ND | -          | -   | -  | -   | +  | M + L     | 2.8 + 3.8 | ND      | ND  | -                   | +   | 19  | NoRec , SD    |
| m/61 (11)   | -                 | +  | -  | -  | -          | +   | +  | -   | -  | L         | 7.7       | 3/50    | Sp  | -                   | +   | 2   | NoRec, SD     |
| m/34 (12)   | -                 | -  | +  | -  | +          | -   | -  | +   | +  | L         | 5.2       | ND      | ND  | TEE                 | -   | 12  | DOD           |
| m/57 (13)   | -                 | +  | +  | -  | +          | -   | -  | -   | +  | L         | 12.7      | ND      | Mix | TEE                 | -   | 3   | Rec           |
| m/75 (14)   | -                 | -  | -  | +  | +          | -   | -  | +   | +  | L         | 14.0      | 1/10    | ND  | TEE                 | -   | ND  | ND            |
| m/59 (15)   | +                 | -  | -  | -  | +          | -   | -  | +   | +  | L         | 13.5      | 2/50    | ND  | TEE                 | -   | 12  | NoRec         |
| m/46 (16)   | -                 | +  | +  | -  | -          | -   | -  | -   | -  | M         | 8.5       | 0/50    | Sp  | EN                  | -   | 14  | NoRec         |
| m/71 (17)   | -                 | +  | -  | -  | -          | +   | -  | +   | -  | M         | 5.3       | ND      | ND  | TEE                 | -   | 9   | NoRec         |
| m/57 (18)   | -                 | +  | -  | +  | +          | -   | -  | -   | -  | L         | 16.0      | 30/50   | Sp  | TEE                 | -   | 60  | Rec, DOD (i1) |
| m/57 (18)   | -                 | -  | -  | +  | +          | -   | -  | -   | -  | L         | 11.0      | 25/50   | Sp  | TEE                 | -   | 58  | Rec, DOD      |
| m/49 (18)   | +                 | -  | -  | -  | +          | -   | -  | -   | -  | L         | 3.0       | 0/50    | Sp  | EN                  | -   | 202 | DDD           |
| f/58 (18)   | -                 | +  | -  | -  | -          | -   | -  | -   | -  | L         | 12.0      | 16/50   | Ep  | TEE                 | -   | 28  | Rec, DOD (i2) |
| f/71 (18)   | -                 | +  | -  | -  | +          | -   | -  | -   | -  | L         | 9.0       | < 5/50  | Sp  | TEE                 | -   | 102 | NED           |
| m/56 (18)   | -                 | +  | -  | -  | +          | -   | -  | -   | -  | L         | 15.0      | 22/50   | Sp  | TEE                 | -   | 63  | Rec, DOD      |
| m/52 (18)   | +                 | -  | -  | -  | +          | -   | -  | -   | -  | L         | 4.5       | < 5/50  | Sp  | EN                  | -   | 14  | NED           |
| f/64 (18)   | -                 | +  | -  | -  | +          | -   | -  | -   | -  | L         | 7.5       | 0/50    | Sp  | EN                  | -   | 14  | NED           |
| f/74 (19)   | -                 | -  | -  | -  | +          | +   | -  | +   | -  | L         | 12.5      | 30/50   | Sp  | EN                  | +   | 49  | Rec, AWD (i3) |
| m/60 (19)   | +                 | -  | -  | -  | +          | +   | -  | +   | -  | L         | 5.5       | 8/50    | Ep  | EN                  | -   | 41  | Rec, NED (i4) |
| m/60 (19)   | -                 | +  | -  | +  | +          | +   | -  | +   | -  | L         | 8.2       | 8/50    | Mix | EN                  | -   | 26  | NED           |
| f/75 (19)   | +                 | -  | -  | -  | +          | +   | -  | +   | -  | L         | 7.2       | 5/50    | Sp  | EN                  | -   | 17  | NED           |
| m/61 (20)   | ND                | ND | ND | ND | ND         | ND  | ND | ND  | ND | L         | 2.6       | 10/50   | Sp  | ND                  | -   | 14  | DDD (i5)      |
| m/54 (20)   | +                 | -  | -  | -  | ND         | ND  | ND | ND  | ND | L         | 3.5       | 2/50    | Sp  | ND                  | -   | 55  | NED           |
| m/50 (20)   | +                 | -  | -  | -  | ND         | ND  | ND | ND  | ND | L         | 4.0       | 6/50    | Sp  | ND                  | -   | 106 | NED           |
| m/49 (20)   | -                 | +  | +  | -  | ND         | ND  | ND | ND  | ND | L         | 4.5       | 0/50    | Sp  | ND                  | -   | 176 | NED           |
| m/56 (20)   | -                 | +  | -  | -  | ND         | ND  | ND | ND  | ND | L         | 5.0       | 14/50   | Sp  | ND                  | -   | 20  | DOD (i6)      |

## Esophageal GIST

|           |    |    |    |    |    |    |    |    |    |    |      |       |    |     |    |     |          |
|-----------|----|----|----|----|----|----|----|----|----|----|------|-------|----|-----|----|-----|----------|
| f/66 (20) | -  | +  | -  | -  | ND | ND | ND | ND | ND | L  | 6.0  | 15/50 | Sp | ND  | -  | 62  | NED      |
| m/65 (20) | -  | -  | -  | +  | ND | ND | ND | ND | ND | L  | 7.0  | 1/50  | Ep | ND  | -  | 2   | DUC      |
| m/55 (20) | -  | +  | -  | -  | ND | ND | ND | ND | ND | L  | 8.0  | 26/50 | Sp | ND  | -  | 140 | NED      |
| f/58 (20) | -  | +  | +  | -  | ND | ND | ND | ND | ND | L  | 8.5  | 59/50 | Sp | ND  | -  | ND  | ND       |
| m/69 (20) | -  | +  | -  | -  | ND | ND | ND | ND | ND | L  | 9.0  | 20/50 | Sp | ND  | -  | 27  | DOD      |
| m/63 (20) | -  | +  | -  | -  | ND | ND | ND | ND | ND | L  | 10.0 | 79/50 | Sp | ND  | -  | 29  | DOD      |
| m/52 (20) | -  | +  | +  | -  | ND | ND | ND | ND | ND | L  | 11.0 | 21/50 | Sp | ND  | -  | 54  | DOD (i7) |
| f/66 (20) | -  | -  | -  | -  | ND | ND | ND | ND | ND | L  | 15.0 | 16/50 | Ep | ND  | -  | 46  | DOD (i8) |
| f/68 (20) | -  | -  | -  | -  | ND | ND | ND | ND | ND | L  | 17.0 | 28/50 | Ep | ND  | -  | 49  | DOD      |
| f/70 (20) | -  | -  | -  | -  | ND | ND | ND | ND | ND | L  | 25.0 | 5/50  | Sp | ND  | -  | 18  | DOD      |
| m/68 (20) | ND | L  | ND   | 15/50 | Ep | ND  | -  | 22  | DOD      |
| m/75 (20) | ND | L  | ND   | 64/50 | Sp | ND  | -  | 37  | DOD      |
| f/77      | -  | +  | +  | -  | -  | -  | +  | +  | -  | ND | 9.0  | ND    | Sp | TEE | -  | 73  | Rec/DOD  |
| f/47      | ND | 1.5  | ND    | ND | ND  | ND | ND  | ND       |
| m/68      | -  | +  | +  | -  | -  | -  | +  | -  | +  | L  | 6.0  | ND    | Sp | TEE | -  | ND  | ND       |
| f/37      | -  | -  | -  | -  | ND | ND | ND | ND | ND | ND | 1.8  | 1/50  | Sp | EN  | -  | 119 | NoRec    |
| f/63      | -  | +  | -  | -  | ND | ND | ND | ND | ND | L  | 5.0  | 1/50  | Sp | EN  | -  | 55  | NoRec    |
| m/88      | ND   | 3/50  | Sp | ND  | ND | ND  | ND       |
| m/62      | +  | -  | -  | -  | -  | -  | -  | -  | -  | L  | 0.6  | 0/50  | Sp | TEE | -  | 8   | NoRec    |

+/-: yes/no; AWD-alive with disease; BL-bleeding (gastrointestinal bleeding, hemoptysis, melena); CM-cell morphology; CT-(PET)CT; DDD-died of different disease; DOD-died of disease; DP-dysphagia; DUC-died of unknown cause; EGD-esophagogastroduodenoscopy; EN-thoracotomy, enucleation with excision of surrounding muscle (no mucosal excision); Ep-epithelioid; ES-endoscopy; EUS-endoscopic ultrasound; FNA-fine needle aspiration; FU-follow up (months); Inc-incident; (L)-Literature; Loc-localisation-upper/middle/lower third of esophagus; Mix-mixed; MR-mitotic rate (x/x HPF); NED-no evidence of disease; ND-no data; NoRec-norecurrence; Rec-recurrence/metastasis; SD-stable disease; Size-size (cm); Sp-spindle; Surg-surgery; TEE-thoracotomy, esophagectomy, esophagogastrostomy; TKI-tyrosine kinase inhibitor; WL-weight loss. Additional information: i1-liver metastases after 30 months; i2-liver metastases after 4 months; i3-recurrence after 36 months; i4-recurrence after 19 months, therefore TEE, now NED; i5-cerebrovascular incident; i6-liver metastases at surgery; i7-lung metastases; i8-lung metastases. Literature: (1)-Yamada/2011<sup>1</sup>; (2)-Ozan/2010<sup>2</sup>; (3)-Kaida/2010<sup>3</sup>; (4)-Hamada/2010<sup>4</sup>; (5)-Spinelli/2008<sup>5</sup>; (6)-Sakai/2008<sup>6</sup>; (7)-Papaspyros/2008<sup>7</sup>; (8)-Fang/2007<sup>8</sup>; (9)-Portale/2007<sup>9</sup>; (10)-Graham/2007<sup>10</sup>; (11)-Al-Salam/2006<sup>11</sup>; (12)-Axel/2005<sup>12</sup>; (13)-Padula/2005<sup>13</sup>; (14)-Manu/2005<sup>14</sup>; (15)-Gouveia/2005<sup>15</sup>; (16)-Ertem/2004<sup>16</sup>; (17)-Iijima/2002<sup>17</sup>; (18)-Jiang/2010<sup>18</sup>; (19)-Blum/2007<sup>19</sup>; (20)-Miettinen/2000<sup>20</sup>. Esophageal GIST patients: Green: case reports from the literature; Blue: case series from the literature; Yellow: patients extracted from Ulmer GIST registry.
